# Supplementary material
Source: MDPI journal article supplement (https://www.mdpi.com/2071-1050/12/20/8424)
Supplement: s1 [file s1]

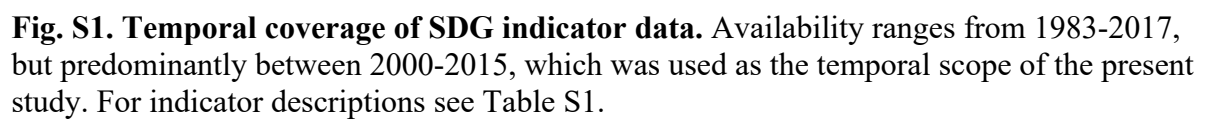

**Fig. S1. Temporal coverage of SDG indicator data.** Availability ranges from 1983-2017, but predominantly between 2000-2015, which was used as the temporal scope of the present study. For indicator descriptions see Table S1.

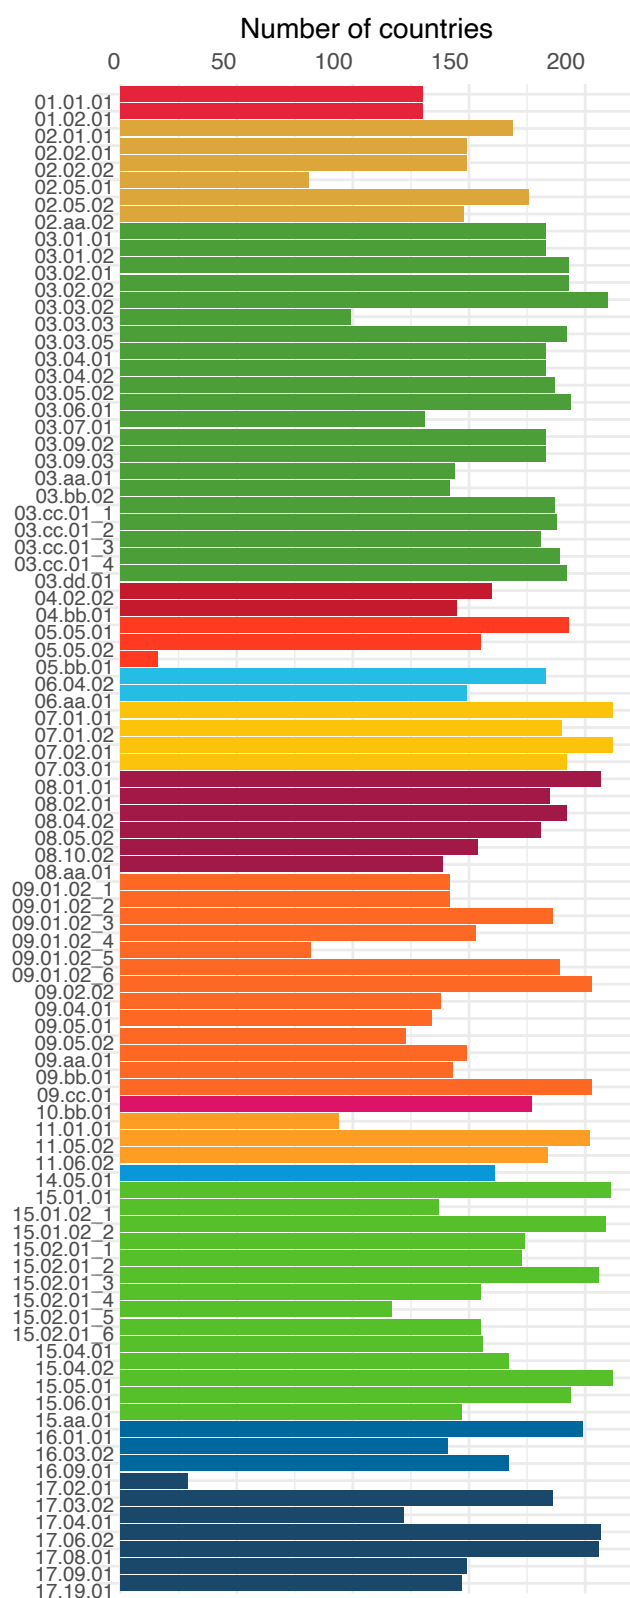

**Fig. S2. Number of countries available by SDG indicator.** In the analyses, countries and indicators were filtered to generate a complete data set of countries and indicators. For indicator descriptions see Table S.

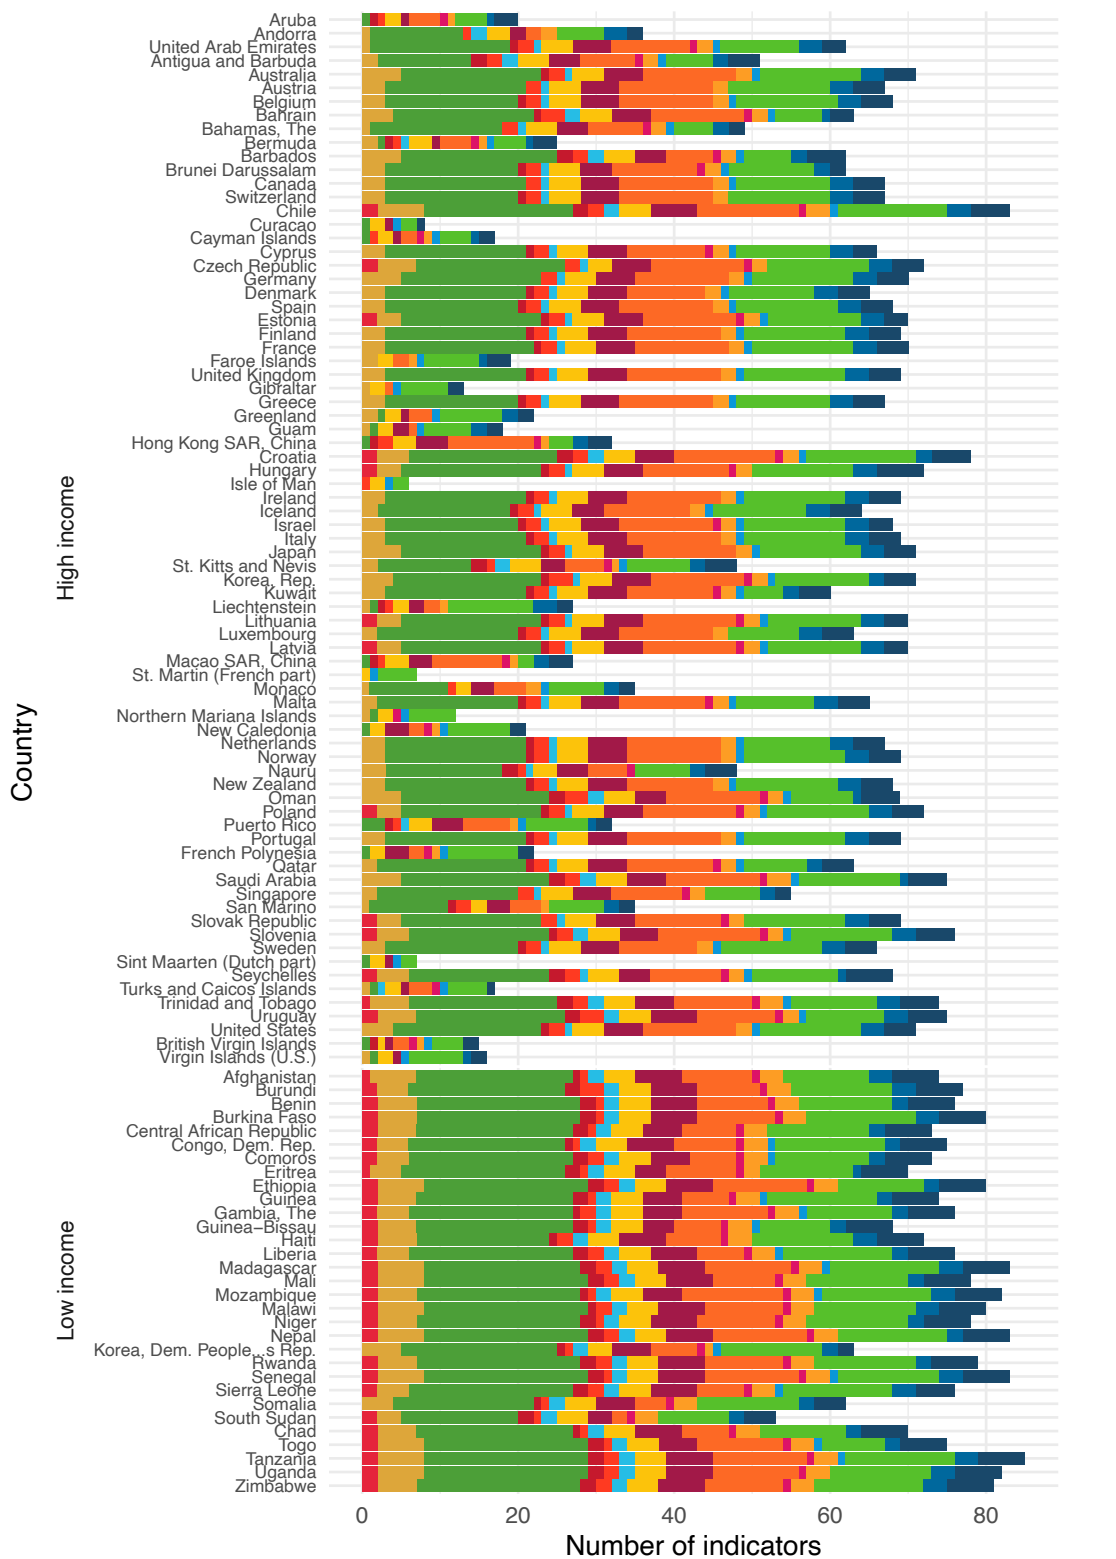

**Fig. S3. SDG indicator availability for high- and low-income countries.** Countries and indicators were filtered to generate a complete data set of countries and indicators for subsequent analyses.

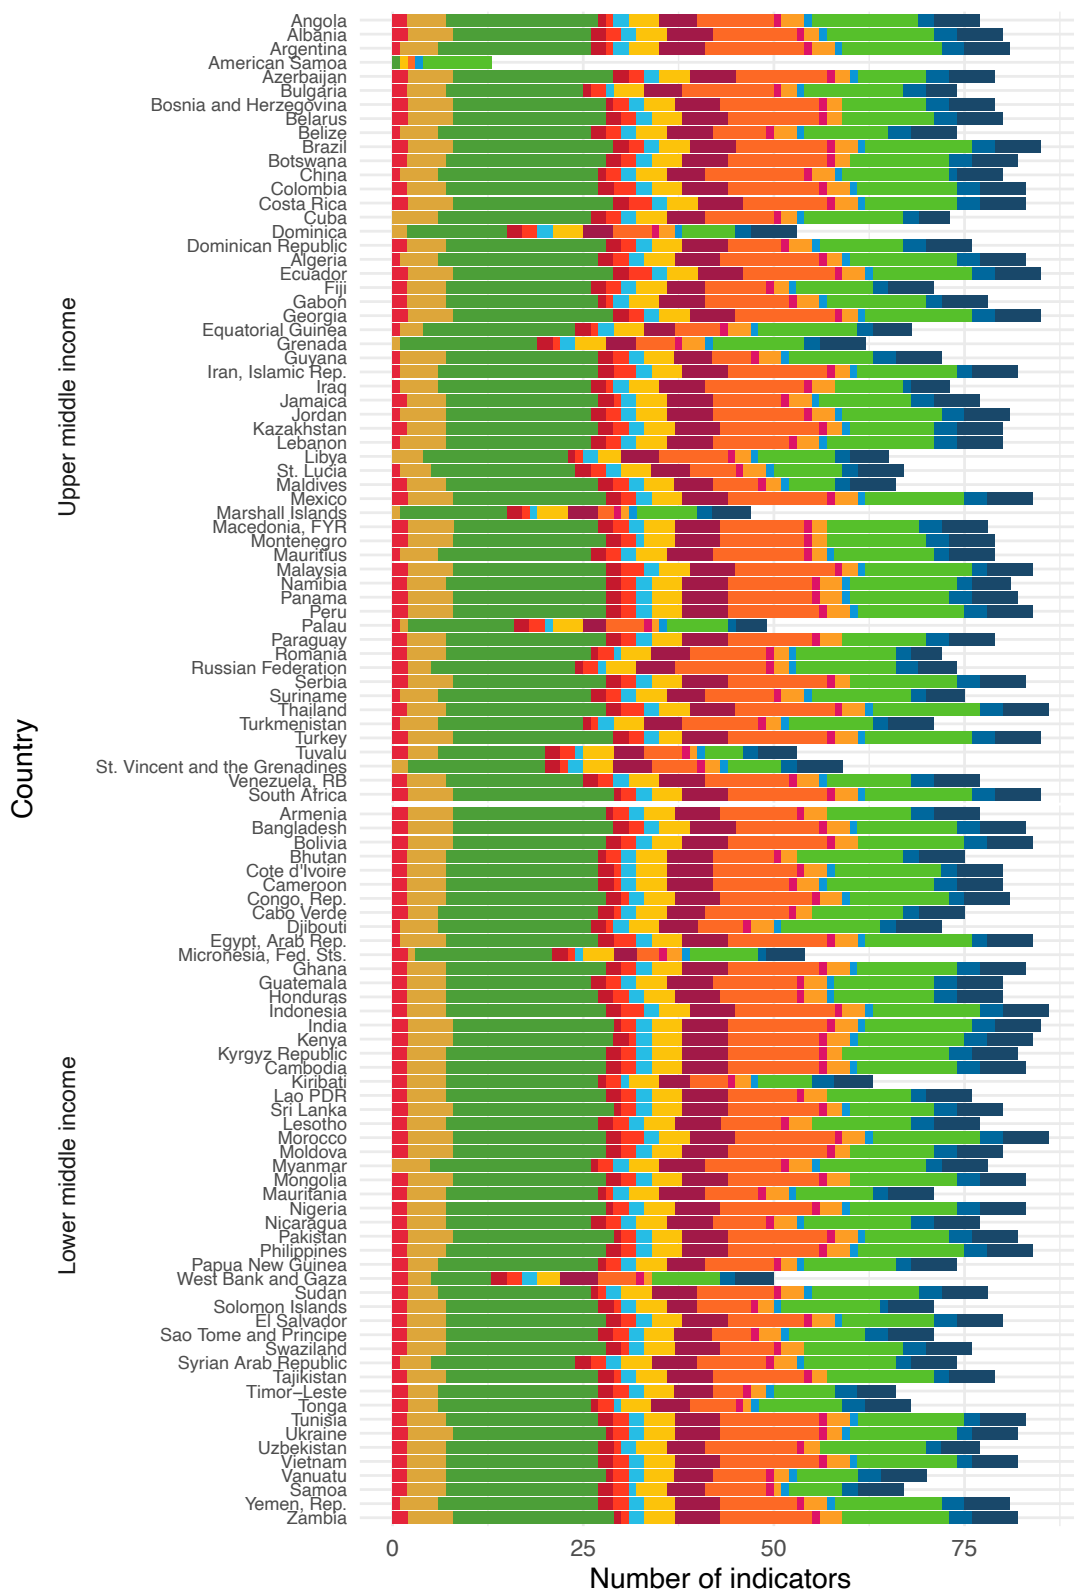

**Fig. S4. SDG indicator availability for middle-income countries.** Countries and indicators were filtered to generate a complete data set of countries and indicators for subsequent analyses.

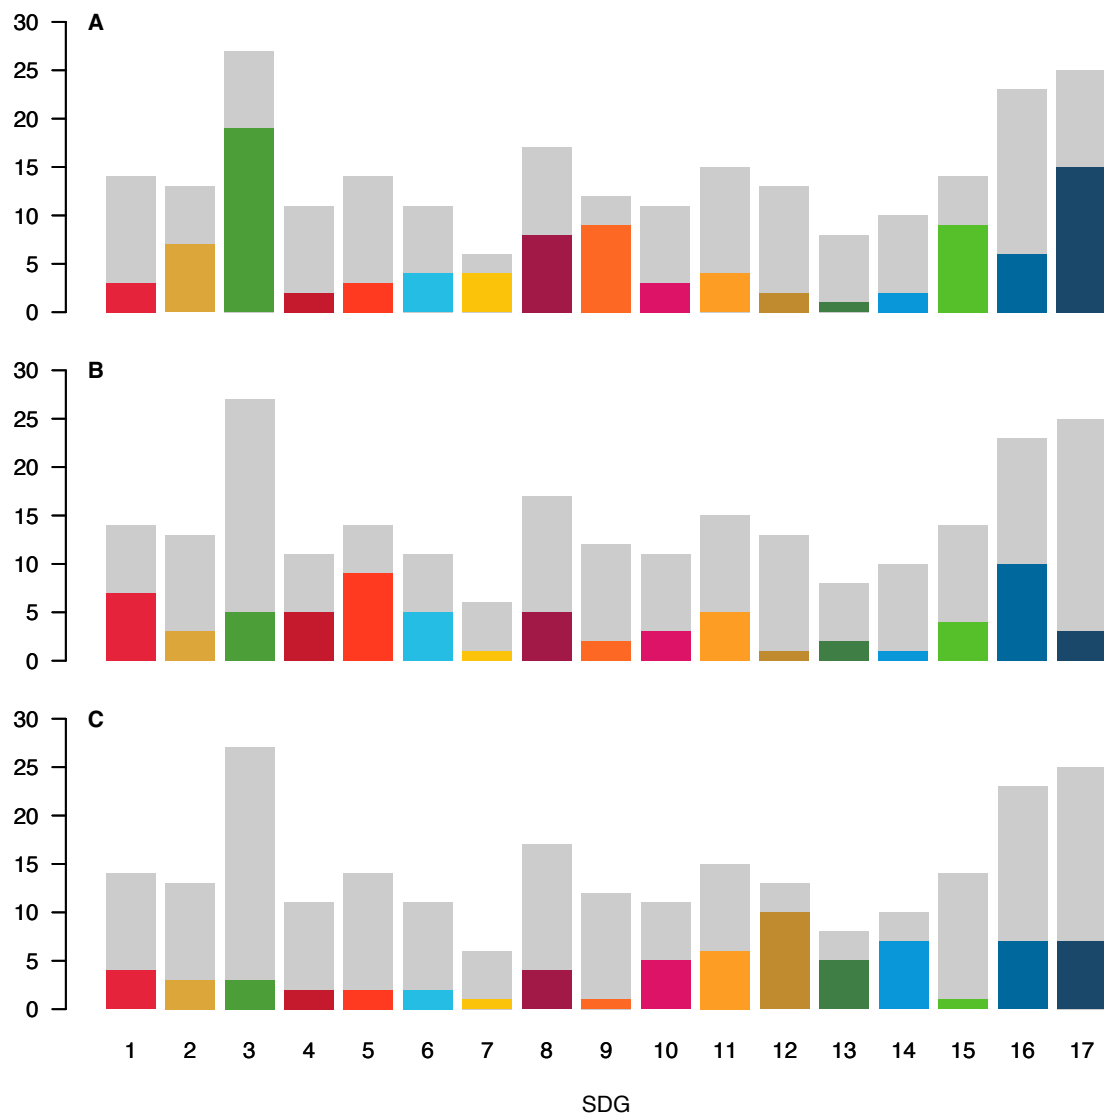

**Fig. S5. Number of SDG indicators available by tier** (UN Economic and Social Council 2017). Bars coloured by SDG; grey bars indicate total number of indicators per goal, irrespective of tier. Indicators in tier 1 are conceptually clear, internationally established methodology and standards are available, and data are regularly produced by countries (A). Indicators in tier 2 are conceptually clear, internationally established methodology and standards are available, but data are not regularly produced by countries (B). For indicators in tier 3, internationally established methodology and/or standards are not yet available, but methodology and/or standards are being (or will be) developed or tested (C). Only indicators in tier 1 were used in this study.

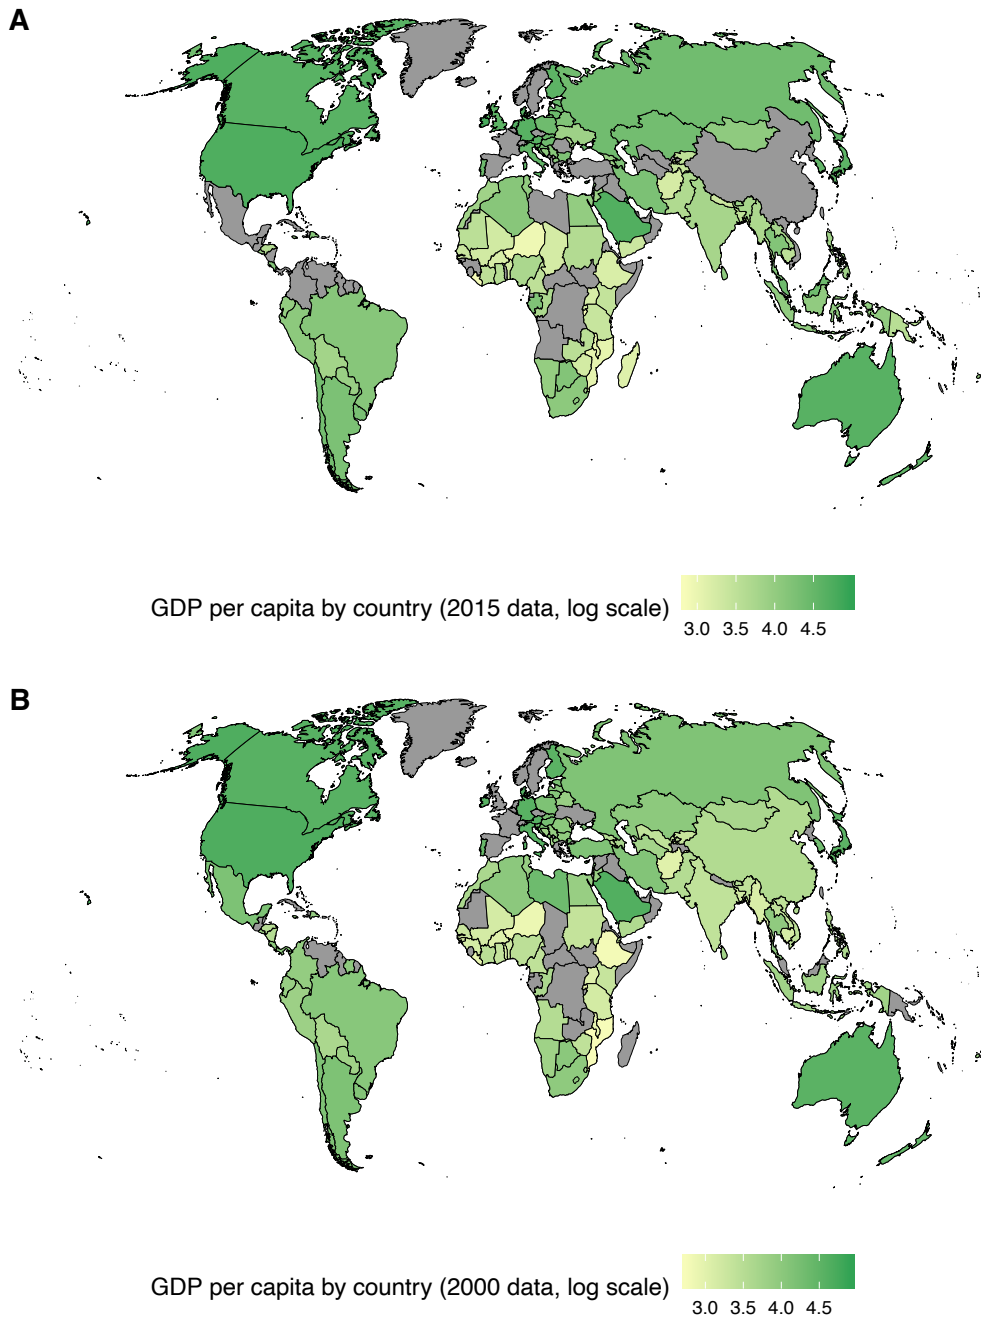

**Fig. S6. Countries included in analyses.** Countries with data on SDG status ( $n = 123$ ) (A), and on SDG progress ( $n = 127$ ; 2000-2015) (B). Countries coloured by income values used in respective analyses (GDP per capita PPP, constant 2011 international \$). Countries in grey are missing data on some SDG indicators and thus not included in analyses.

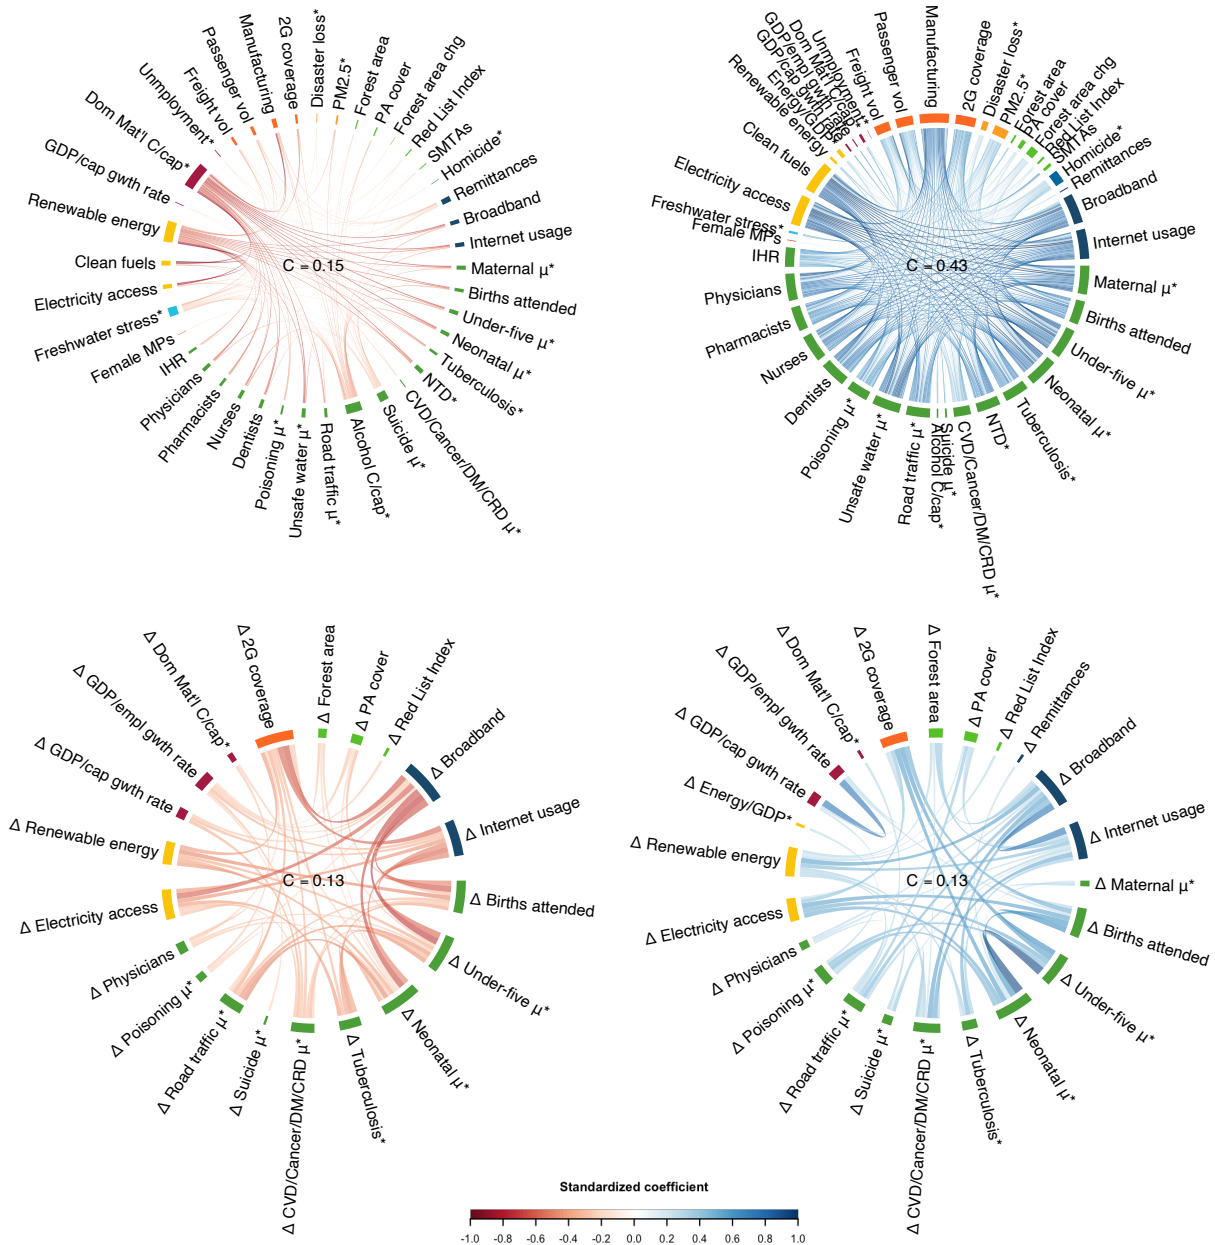

**Fig. S7. Connectivity of SDG *status* (top; A, B) and *trends* (bottom; C, D)** derived from regression models *before controlling for GDP per capita*. Connections show significant negative (A, C) and positive (B, D) relationships. Significance cutoff's are corrected for multiple comparisons following Benjamini & Hochberg (1995), resulting in  $q^* = 0.029$  for *status* models (A, B); and  $q^* = 0.013$  for *trend* models (C, D); equivalent to a false discovery rate  $\alpha = 0.05$ . *Status* models use most-recent reported SDG indicator levels on 42 SDG indicators across 123 countries, *trend* models use mean annual change values on 29 SDG indicators between 2000-2015 across 127 countries. Inside the diagrams, quantity  $C$  specifies network connectivity: the proportion of relationships significant at  $q^*$ . Link color and width are proportional to relationship strength. Indicator sector colors reflect overarching SDG; indicator sector width is proportional to total relationship strength for each indicator. Indicator names appended with an asterisk were inverted (i.e., multiplied with -1), so that greater SDG indicator values signify more desirable outcomes for all indicators.

**Table S1. Descriptions of SDG indicators at tier 1**

| <b>Indicator code</b> | <b>Series description</b>                                                                                                                              | <b>In status dataset</b> | <b>In progress dataset</b> | <b>Inverted</b> |
|-----------------------|--------------------------------------------------------------------------------------------------------------------------------------------------------|--------------------------|----------------------------|-----------------|
| <b>1.1.1</b>          | Proportion of population below the international poverty line of US\$1.90 per day                                                                      |                          |                            | ✓               |
| <b>1.2.1</b>          | Proportion of population below national poverty line                                                                                                   |                          |                            | ✓               |
| <b>2.1.1</b>          | Prevalence of undernourishment                                                                                                                         |                          |                            | ✓               |
| <b>2.2.1</b>          | Proportion of stunted children (height for age below minus two standard deviations from the median) under the age of 5 years                           |                          |                            | ✓               |
| <b>2.2.2</b>          | Proportion of wasted children (weight for height below minus two standard deviations from the median) under the age of 5 years                         |                          |                            | ✓               |
| <b>2.5.1</b>          | Number of accessions of plant genetic resources secured in conservation facilities under medium or long term conditions                                |                          |                            |                 |
| <b>2.5.2</b>          | Proportion of local breeds classified as being at risk of extinction                                                                                   |                          |                            | ✓               |
| <b>2.a.2</b>          | Total official flows disbursements for agriculture, by recipient                                                                                       |                          |                            |                 |
| <b>3.1.1</b>          | Maternal mortality ratio                                                                                                                               | ✓                        | ✓                          | ✓               |
| <b>3.1.2</b>          | Proportion of births attended by skilled health personnel                                                                                              | ✓                        | ✓                          |                 |
| <b>3.2.1</b>          | Under-five mortality rate                                                                                                                              | ✓                        | ✓                          | ✓               |
| <b>3.2.2</b>          | Neonatal mortality rate                                                                                                                                | ✓                        | ✓                          | ✓               |
| <b>3.3.2</b>          | Tuberculosis incidence per 100,000 population                                                                                                          | ✓                        | ✓                          | ✓               |
| <b>3.3.3</b>          | Malaria incidence per 1,000 population                                                                                                                 |                          |                            | ✓               |
| <b>3.3.5</b>          | Number of people requiring interventions against neglected tropical diseases                                                                           | ✓                        | ✓                          | ✓               |
| <b>3.4.1</b>          | Mortality rate attributed to cardiovascular disease, cancer, diabetes or chronic respiratory disease                                                   | ✓                        | ✓                          | ✓               |
| <b>3.4.2</b>          | Suicide mortality rate                                                                                                                                 | ✓                        | ✓                          | ✓               |
| <b>3.5.2</b>          | Alcohol per capita consumption (aged 15 years and older) within a calendar year in litres of pure alcohol                                              | ✓                        |                            | ✓               |
| <b>3.6.1</b>          | Death rate due to road traffic injuries                                                                                                                | ✓                        | ✓                          | ✓               |
| <b>3.7.1</b>          | Proportion of women married or in a union of reproductive age (aged 15-49 years) who have their need for family planning satisfied with modern methods |                          |                            |                 |
| <b>3.9.2</b>          | Mortality rate attributed to unsafe water, unsafe sanitation and lack of hygiene                                                                       | ✓                        |                            | ✓               |
| <b>3.9.3</b>          | Mortality rate attributed to unintentional poisonings                                                                                                  | ✓                        | ✓                          | ✓               |
| <b>3.a.1</b>          | Prevalence of current tobacco use among persons aged 15 years and older                                                                                |                          |                            | ✓               |
| <b>3.b.2</b>          | Total net official disbursements for medical research and basic health sectors, by recipient                                                           |                          |                            |                 |
| <b>3.c.1</b>          | Health worker density of dentistry personnel per 1,000 population                                                                                      | ✓                        |                            |                 |
| <b>3.c.1</b>          | Health worker density of nursing and midwifery personnel per 1,000 population                                                                          | ✓                        |                            |                 |
| <b>3.c.1</b>          | Health worker density of pharmaceutical personnel per 1,000 population                                                                                 | ✓                        |                            |                 |



**Table S1. Descriptions of SDG indicators at tier 1**

| Indicator code | Series description                                                                                                                         | In status dataset | In progress dataset | Inverted |
|----------------|--------------------------------------------------------------------------------------------------------------------------------------------|-------------------|---------------------|----------|
| 3.c.1          | Health worker density of physicians per 1,000 population                                                                                   | ✓                 | ✓                   |          |
| 3.d.1          | International Health Regulations (IHR) core capacity index                                                                                 | ✓                 |                     |          |
| 4.2.2          | Participation rate in organized learning (one year before the official primary entry age)                                                  |                   |                     |          |
| 4.b.1          | Total official flows for scholarships, by recipient                                                                                        |                   |                     |          |
| 5.5.1          | Proportion of seats held by women in national parliaments                                                                                  | ✓                 | ✓                   |          |
| 5.5.2          | Proportion of women in managerial positions                                                                                                |                   |                     |          |
| 5.b.1          | Proportion of individuals who own a mobile telephone                                                                                       |                   |                     |          |
| 6.4.2          | Level of water stress: freshwater withdrawal as a proportion of available freshwater resources                                             | ✓                 |                     | ✓        |
| 6.a.1          | Total official flows for water supply and sanitation, by recipient                                                                         |                   |                     |          |
| 7.1.1          | Proportion of population with access to electricity                                                                                        | ✓                 | ✓                   |          |
| 7.1.2          | Proportion of population with primary reliance on clean fuels and technology                                                               | ✓                 |                     |          |
| 7.2.1          | Renewable energy share in the total final energy consumption                                                                               | ✓                 | ✓                   |          |
| 7.3.1          | Energy intensity level of primary energy                                                                                                   | ✓                 | ✓                   | ✓        |
| 8.1.1          | Growth rate of real GDP per capita                                                                                                         | ✓                 | ✓                   |          |
| 8.2.1          | Growth rate of real GDP per employed person                                                                                                | ✓                 | ✓                   |          |
| 8.4.2          | Domestic material consumption per capita                                                                                                   | ✓                 | ✓                   | ✓        |
| 8.5.2          | Unemployment rate                                                                                                                          | ✓                 |                     | ✓        |
| 8.10.2         | Proportion of adults (15 years and older) with an account at a bank or other financial institution or with a mobile-money-service provider |                   |                     |          |
| 8.a.1          | Total official flows disbursed for Aid for Trade, by recipient                                                                             |                   |                     |          |
| 9.1.2          | Freight volume (tonne kilometres), by air transport                                                                                        |                   |                     |          |
| 9.1.2          | Freight volume (tonne kilometres), by rail transport                                                                                       |                   |                     |          |
| 9.1.2          | Freight volume (tonne kilometres), by road transport                                                                                       | ✓                 |                     |          |
| 9.1.2          | Passenger volume (passenger kilometres), by air transport                                                                                  |                   |                     |          |
| 9.1.2          | Passenger volume (passenger kilometres), by rail transport                                                                                 |                   |                     |          |
| 9.1.2          | Passenger volume (passenger kilometres), by road transport                                                                                 | ✓                 |                     |          |
| 9.2.1          | Manufacturing value added per capita at constant 2010 United States dollars                                                                | ✓                 | ✓                   |          |
| 9.4.1          | Emissions of carbon dioxide per unit of Manufacturing Value Added                                                                          |                   |                     |          |
| 9.5.1          | Research and development (R&D) expenditure as a proportion of GDP                                                                          |                   |                     |          |
| 9.5.2          | Researchers (in full-time equivalent) per million inhabitants                                                                              |                   |                     |          |
| 9.a.1          | Total official flows for infrastructure, by recipient                                                                                      |                   |                     |          |
| 9.b.1          | Proportion of medium and high-tech industry value added in total value added                                                               |                   |                     |          |

**Table S1. Descriptions of SDG indicators at tier 1**

| Indicator code | Series description                                                                                                                                           | In status dataset | In progress dataset | Inverted |
|----------------|--------------------------------------------------------------------------------------------------------------------------------------------------------------|-------------------|---------------------|----------|
| 9.c.1          | Proportion of population covered by at least a 2G mobile network                                                                                             | ✓                 | ✓                   |          |
| 10.b.1         | Total assistance for development, by recipient                                                                                                               |                   |                     |          |
| 11.1.1         | Proportion of urban population living in slums                                                                                                               |                   |                     | ✓        |
| 11.5.2         | Direct disaster economic loss, average annual loss in relation to global GDP                                                                                 | ✓                 |                     | ✓        |
| 11.6.2         | Annual mean levels of fine particulate matter (PM2.5) in cities (population weighted)                                                                        | ✓                 |                     | ✓        |
| 14.5.1         | Coverage of protected areas in relation to marine areas                                                                                                      |                   |                     |          |
| 15.1.1         | Forest area as a proportion of total land area                                                                                                               | ✓                 | ✓                   |          |
| 15.1.2         | Proportion of important sites for freshwater biodiversity that are covered by protected areas                                                                |                   |                     |          |
| 15.1.2         | Proportion of important sites for terrestrial biodiversity that are covered by protected areas                                                               | ✓                 | ✓                   |          |
| 15.2.1         | Above-ground biomass in forest                                                                                                                               |                   |                     |          |
| 15.2.1         | Above-ground biomass in forest per hectare                                                                                                                   |                   |                     |          |
| 15.2.1         | Forest area net change rate                                                                                                                                  | ✓                 | ✓                   |          |
| 15.2.1         | Forest area within legally established protected areas                                                                                                       |                   |                     |          |
| 15.2.1         | Proportion of forest area with a long-term management plan                                                                                                   |                   |                     |          |
| 15.2.1         | Proportion of forest area within legally established protected areas                                                                                         |                   |                     |          |
| 15.4.1         | Coverage by protected areas of important sites for mountain biodiversity                                                                                     |                   |                     |          |
| 15.4.2         | Mountain Green Cover Index                                                                                                                                   |                   |                     |          |
| 15.5.1         | Red List Index                                                                                                                                               | ✓                 | ✓                   |          |
| 15.6.1         | Total reported number of Standard Material Transfer Agreements (SMTAs) transferring plant genetic resources for food and agriculture to the country          | ✓                 | ✓                   |          |
| 15.a.1         | Total official development assistance for biodiversity, by recipient                                                                                         |                   |                     |          |
| 16.1.1         | Number of victims of intentional homicide per 100,000 population                                                                                             | ✓                 | ✓                   | ✓        |
| 16.3.2         | Unsented detainees as a proportion of overall prison population                                                                                              |                   |                     | ✓        |
| 16.9.1         | Proportion of births registered with a civil authority                                                                                                       |                   |                     |          |
| 17.2.1         | Net official development assistance (ODA) to LDCs as a percentage of OECD-DAC donors' GNI, by donor                                                          |                   |                     |          |
| 17.3.2         | Volume of remittances (in United States dollars) as a proportion of total GDP                                                                                | ✓                 | ✓                   |          |
| 17.4.1         | Debt service as a proportion of exports of goods and services                                                                                                |                   |                     |          |
| 17.6.2         | Fixed Internet broadband Subscriptions per 100 inhabitants                                                                                                   | ✓                 | ✓                   |          |
| 17.8.1         | Proportion of individuals using the Internet                                                                                                                 | ✓                 | ✓                   |          |
| 17.9.1         | Dollar value of financial and technical assistance (including through North-South, South-South and triangular cooperation) disbursed to developing countries |                   |                     |          |

**Table S1. Descriptions of SDG indicators at tier 1**

| <b>Indicator code</b> | <b>Series description</b>                                                                               | <b>In status dataset</b> | <b>In progress dataset</b> | <b>Inverted</b> |
|-----------------------|---------------------------------------------------------------------------------------------------------|--------------------------|----------------------------|-----------------|
| <b>17.19.1</b>        | Dollar value of all resources made available to strengthen statistical capacity in developing countries |                          |                            |                 |

**Table S2.** Proportion of significant links for SDG status indicators. Table shows the indicator-level proportion of significant links, at the Benjamini-Hochberg-corrected significance level for each model type. Blanks indicate no significant relationships. Indicators with asterisk (\*) were inverted.

| Indicator | Indicator name                           | SDG status            |                       |                       |                       |
|-----------|------------------------------------------|-----------------------|-----------------------|-----------------------|-----------------------|
|           |                                          | Simple regression     |                       | Accounting for GDP    |                       |
|           |                                          | Degree negative links | Degree positive links | Degree negative links | Degree positive links |
| 3.1.1     | Maternal mortality (rate)*               | 0.15                  | 0.63                  |                       | 0.39                  |
| 3.1.2     | Births attended by health personnel (%)  | 0.10                  | 0.61                  | 0.10                  | 0.27                  |
| 3.2.1     | Under-five mortality (rate)*             | 0.15                  | 0.66                  | 0.02                  | 0.46                  |
| 3.2.2     | Neonatal mortality (rate)*               | 0.12                  | 0.66                  | 0.02                  | 0.44                  |
| 3.3.2     | Tuberculosis (incidence)*                | 0.10                  | 0.66                  |                       | 0.34                  |
| 3.3.5     | Neglected tropical diseases (# of ppl)*  | 0.17                  | 0.59                  | 0.17                  | 0.24                  |
| 3.4.1     | CVD,Cancer,Diab.,CRD mort.(rate)*        | 0.05                  | 0.66                  |                       | 0.10                  |
| 3.4.2     | Suicide mortality (rate)*                | 0.49                  | 0.07                  | 0.12                  | 0.12                  |
| 3.5.2     | Alcohol consumption/capita (L/yr)*       | 0.63                  | 0.05                  | 0.29                  | 0.07                  |
| 3.6.1     | Road traffic mortality (rate)*           | 0.12                  | 0.63                  |                       | 0.27                  |
| 3.9.2     | Unsafe water, sanit., hyg. mort. (rate)* | 0.12                  | 0.61                  | 0.02                  | 0.37                  |
| 3.9.3     | Unintentional poisoning mort. (rate)*    | 0.07                  | 0.63                  | 0.02                  | 0.17                  |
| 3.c.1-1   | Dentistry personnel (density)            | 0.12                  | 0.61                  |                       | 0.29                  |
| 3.c.1-2   | Nursing & midwifery person'l (density)   | 0.12                  | 0.68                  | 0.02                  | 0.27                  |
| 3.c.1-3   | Pharmaceutical personnel (density)       | 0.10                  | 0.66                  |                       | 0.10                  |
| 3.c.1-4   | Physician (density)                      | 0.12                  | 0.68                  |                       | 0.29                  |
| 3.d.1     | International Health Regulations (index) | 0.12                  | 0.59                  | 0.02                  | 0.07                  |
| 5.5.1     | Women in Parliament (%)                  | 0.02                  | 0.05                  | 0.02                  | 0.02                  |
| 6.4.2     | Freshwater stress (% of avail. res.)*    | 0.46                  | 0.07                  | 0.10                  | 0.07                  |
| 7.1.1     | Electricity access (%)                   | 0.12                  | 0.61                  | 0.05                  | 0.32                  |
| 7.1.2     | Clean fuels and technology (%)           | 0.12                  | 0.63                  | 0.10                  | 0.22                  |
| 7.2.1     | Renewable energy (% of energy cons.)     | 0.56                  | 0.10                  | 0.17                  | 0.12                  |
| 7.3.1     | Energy intensity of GDP*                 |                       | 0.22                  |                       | 0.07                  |
| 8.1.1     | GDP/capita growth rate (real GDP)        | 0.05                  | 0.07                  | 0.05                  | 0.07                  |
| 8.2.1     | GDP/employed growth rate (real GDP)      |                       | 0.02                  |                       | 0.02                  |
| 8.4.2     | Domestic material consumption/capita*    | 0.63                  | 0.10                  | 0.02                  | 0.02                  |
| 8.5.2     | Unemployment (rate)*                     | 0.05                  | 0.02                  | 0.02                  | 0.02                  |
| 9.1.2-3   | Freight volume (km)                      | 0.12                  | 0.54                  | 0.05                  | 0.07                  |
| 9.1.2-6   | Passenger volume (km)                    | 0.15                  | 0.59                  | 0.02                  | 0.10                  |
| 9.2.2     | Manufacturing (value added/capita)       | 0.15                  | 0.68                  | 0.02                  | 0.15                  |
| 9.c.1     | 2G mobile network coverage (%)           | 0.07                  | 0.61                  |                       | 0.05                  |
| 11.5.2    | Disaster econ. loss (% of glob. GDP)*    | 0.05                  | 0.34                  | 0.02                  | 0.10                  |
| 11.6.2    | Fine particulate matter (level)*         | 0.07                  | 0.56                  | 0.02                  | 0.20                  |
| 15.1.1    | Forest area (% of land)                  | 0.07                  | 0.07                  | 0.07                  | 0.07                  |
| 15.1.2-2  | PA cover of imp. biodiv. sites (%)       | 0.05                  | 0.27                  | 0.10                  | 0.05                  |
| 15.2.1-3  | Forest area net change (rate)            | 0.02                  | 0.44                  |                       |                       |
| 15.5.1    | Red List Index                           | 0.07                  | 0.12                  | 0.05                  | 0.05                  |
| 15.6.1    | Plant genetic res. transf. (# reported)  | 0.05                  | 0.10                  | 0.07                  | 0.07                  |

|        |                                      |      |      |      |      |
|--------|--------------------------------------|------|------|------|------|
| 16.1.1 | Homicide (incidence)*                | 0.02 | 0.54 |      | 0.15 |
| 17.3.2 | Remittances (% of GDP)               | 0.32 | 0.05 |      | 0.34 |
| 17.6.2 | Internet Broadband subscriptions (%) | 0.15 | 0.68 | 0.02 | 0.49 |
| 17.8.1 | Internet usage (%)                   | 0.15 | 0.68 | 0.02 | 0.39 |

**Table S3.** Proportion of significant links for SDG progress indicators. Table shows the indicator-level proportion of significant links, at the Benjamini-Hochberg-corrected significance level for each model type. Blanks indicate no significant relationships. Indicators with asterisk (\*) were inverted.

| Indicator | Indicator name                             | SDG progress          |                       |                       |                       |
|-----------|--------------------------------------------|-----------------------|-----------------------|-----------------------|-----------------------|
|           |                                            | Simple regression     | Accounting for GDP    |                       |                       |
|           |                                            | Degree negative links | Degree positive links | Degree negative links | Degree positive links |
| 3.1.1     | Maternal mortality (rate)*                 |                       | 0.07                  |                       | 0.04                  |
| 3.1.2     | Births attended by health personnel (%)    | 0.25                  | 0.21                  | 0.11                  | 0.07                  |
| 3.2.1     | Under-five mortality (rate)*               | 0.29                  | 0.18                  | 0.04                  | 0.07                  |
| 3.2.2     | Neonatal mortality (rate)*                 | 0.36                  | 0.25                  | 0.07                  | 0.07                  |
| 3.3.2     | Tuberculosis (incidence)*                  | 0.18                  | 0.14                  |                       |                       |
| 3.3.5     | Neglected tropical diseases (# of ppl)*    |                       |                       |                       |                       |
| 3.4.1     | CVD,Cancer,Diab.,CRD mort.(rate)*          | 0.25                  | 0.25                  | 0.11                  | 0.18                  |
| 3.4.2     | Suicide mortality (rate)*                  | 0.04                  | 0.11                  |                       | 0.11                  |
| 3.5.2     | Alcohol consumption/capita (L/yr)*         |                       |                       |                       |                       |
| 3.6.1     | Road traffic mortality (rate)*             | 0.21                  | 0.21                  | 0.04                  | 0.11                  |
| 3.9.2     | Unsafe water, sanit., hyg. mort. (rate)*   |                       |                       |                       |                       |
| 3.9.3     | Unintentional poisoning mort. (rate)*      | 0.11                  | 0.18                  | 0.11                  | 0.18                  |
| 3.c.1-1   | Dentistry personnel (density)              |                       |                       |                       |                       |
| 3.c.1-2   | Nursing & midwifery personnel (density)    |                       |                       |                       |                       |
| 3.c.1-3   | Pharmaceutical personnel (density)         |                       |                       |                       |                       |
| 3.c.1-4   | Physician (density)                        | 0.14                  | 0.11                  |                       |                       |
| 3.d.1     | International Health Regulations (index)   |                       |                       |                       |                       |
| 5.5.1     | Women in Parliament (%)                    |                       |                       |                       |                       |
| 6.4.2     | Freshwater stress (% of avail. res.)*      |                       |                       |                       |                       |
| 7.1.1     | Electricity access (%)                     | 0.25                  | 0.18                  | 0.04                  |                       |
| 7.1.2     | Clean fuels and technology (%)             |                       |                       |                       |                       |
| 7.2.1     | Renewable energy (% of final energy cons.) | 0.18                  | 0.29                  | 0.04                  | 0.11                  |
| 7.3.1     | Energy intensity of GDP*                   |                       | 0.04                  |                       | 0.11                  |
| 8.1.1     | GDP/capita growth rate (real GDP)          | 0.11                  | 0.11                  | 0.11                  | 0.04                  |
| 8.2.1     | GDP/employed growth rate (real GDP)        | 0.21                  | 0.11                  | 0.14                  | 0.04                  |
| 8.4.2     | Domestic material consumption/capita*      | 0.07                  | 0.04                  | 0.14                  | 0.04                  |
| 8.5.2     | Unemployment (rate)*                       |                       |                       |                       |                       |
| 9.1.2-3   | Freight volume (km)                        |                       |                       |                       |                       |
| 9.1.2-6   | Passenger volume (km)                      |                       |                       |                       |                       |
| 9.2.2     | Manufacturing (value added/capita)         |                       |                       |                       |                       |
| 9.c.1     | 2G mobile network coverage (%)             | 0.32                  | 0.21                  |                       |                       |
| 11.5.2    | Disaster econ. loss (% of glob. GDP)*      |                       |                       |                       |                       |
| 11.6.2    | Fine particulate matter (level)*           |                       |                       |                       |                       |
| 15.1.1    | Forest area (% of land)                    | 0.11                  | 0.14                  |                       | 0.07                  |
| 15.1.2-2  | PA cover of imp. biodiv. sites (%)         | 0.14                  | 0.14                  | 0.04                  | 0.07                  |
| 15.2.1-3  | Forest area net change (rate)              |                       |                       |                       |                       |
| 15.5.1    | Red List Index                             | 0.04                  | 0.04                  | 0.04                  | 0.04                  |
| 15.6.1    | Plant genetic res. transf. (# reported)    |                       |                       |                       |                       |
| 16.1.1    | Homicide (incidence)*                      |                       |                       |                       |                       |
| 17.3.2    | Remittances (% of GDP)                     |                       | 0.04                  |                       |                       |
| 17.6.2    | Internet Broadband subscriptions (%)       | 0.29                  | 0.29                  | 0.11                  | 0.25                  |
| 17.8.1    | Internet usage (%)                         | 0.25                  | 0.32                  | 0.11                  | 0.14                  |
